# Supplementary material for: Youth running consensus statement: minimising risk of injury and illness in youth runners
Source: HighWire-hosted journal article supplement (doi:10.1136/bjsports-2020-102518), 2020-10-29
Supplement: bjsports-2020-102518supp001_data_supplement.pdf [file bjsports-2020-102518supp001_data_supplement.pdf]

## SUPPLEMENTARY INFORMATION

**TABLE 1– HEIGHT, WEIGHT and BMI**

| Author (Year)               | Study Design       | No. of Subjects | Population Age Range | Population Sex                                     | Outcome Measure                                             | Summary                                                                                                                                                                                                                                                                                                                                                                                       | Level of Evidence |
|-----------------------------|--------------------|-----------------|----------------------|----------------------------------------------------|-------------------------------------------------------------|-----------------------------------------------------------------------------------------------------------------------------------------------------------------------------------------------------------------------------------------------------------------------------------------------------------------------------------------------------------------------------------------------|-------------------|
| Rauh 2006 <sup>14</sup>     | Prospective Cohort | 421             | 14-8 yr              | 186 F / 235 M<br>high school cross country runners | Injuries                                                    | <ul style="list-style-type: none"> <li>The overall incidence rate of injury was 17.0/1,000 AE.</li> <li>Runners with a BMI in the first (RR=0.8; 95% CI: 0.6, 1.1) and fourth (RR=1.1; 95% CI: 0.8, 1.5) quartiles had a similar injury risk as runners with a BMI in the combined second and third quartiles (reference group).</li> </ul>                                                   | 2                 |
| Yagi 2013 <sup>15</sup>     | Cohort             | 230             | 14-18 yr             | 186 F / 235 M<br>high school cross country runners | Shin pain (medial tibial stress syndrome & stress fracture) | <ul style="list-style-type: none"> <li>Injury rate for medial tibial stress syndrome was 0.29/1000 AE (n=102) and for stress fracture was 0.06/1000 AE (n=21).</li> <li>In females, the odds of incurring medial tibial stress syndrome increased with BMI (adjusted OR, 0.51; 95% CI: 0.31, 0.86).</li> </ul>                                                                                | 4                 |
| Plisky 2006 <sup>16</sup>   | Prospective Cohort | 105             | 13-18 yr             | 46 F / 59 M<br>high school cross country runners   | Medial tibial stress syndrome                               | <ul style="list-style-type: none"> <li>Injury rate for medial tibial stress syndrome was 2.8/1000 AE overall</li> <li>Runners with a BMI in the third quartile (20.2-21.6 kg/m<sup>2</sup>) had 7.3 times greater odds of developing medial tibial stress syndrome (OR=7.3, 95% CI: 1.2, 43.5) than runners in the second quartile (18.8-20.1 kg/m<sup>2</sup> [reference group]).</li> </ul> | 2                 |
| Tenforde 2013 <sup>17</sup> | Prospective Cohort | 748             | 13-18 yr             | 442 F / 306 M<br>high school runners               | Stress fractures                                            | <ul style="list-style-type: none"> <li>Prospective stress fractures in 5.4% of girls (n = 23) and 4.0% of boys (n = 11).</li> <li>BMI &lt; 19 kg/m<sup>2</sup>, (HR=2.67; 95% CI: 1.11, 6.41) was an independent risk factors for stress fractures in girls.</li> </ul>                                                                                                                       | 2                 |

BMI, body mass index; HR, hazard ratio; OR, odds ratio; RR, rate ratio, CI, confidence interval; AE, athletic exposure

**REFERENCES: TABLE 1– HEIGHT, WEIGHT and BMI**

14. Rauh MJ, Koepsell TD, Rivara FP, et al. Epidemiology of musculoskeletal injuries among high school cross-country runners. *Am J Epidemiol* 2006;163(2):151-9. doi: 10.1093/aje/kwj022 [published Online First: 2005/11/23] [LOE 2]
15. Yagi S, Muneta T, Sekiya I. Incidence and risk factors for medial tibial stress syndrome and tibial stress fracture in high school runners. *Knee Surg Sports Traumatol Arthrosc* 2013;21(3):556-63. doi: 10.1007/s00167-012-2160-x [published Online First: 2012/08/09] [LOE 4]
16. Plisky MS, Rauh MJ, Heiderscheid B, et al. Medial tibial stress syndrome in high school cross-country runners: incidence and risk factors. *J Orthop Sports Phys Ther* 2007;37(2):40-7. doi: 10.2519/jospt.2007.2343 [LOE 2]
17. Tenforde AS, Sayres LC, McCurdy ML, et al. Identifying sex-specific risk factors for stress fractures in adolescent runners. *Med Sci Sports Exerc* 2013;45(10):1843-51. doi: 10.1249/MSS.0b013e3182963d75 [LOE 2]

TABLE 2 – AGE

| Author (Year)              | Study Design             | No. of Subjects | Population Age Range | Population Sex                                        | Outcome Measure               | Summary                                                                                                                                                                                                                                                                                                                                                                                                                                                                                    | Level of Evidence |
|----------------------------|--------------------------|-----------------|----------------------|-------------------------------------------------------|-------------------------------|--------------------------------------------------------------------------------------------------------------------------------------------------------------------------------------------------------------------------------------------------------------------------------------------------------------------------------------------------------------------------------------------------------------------------------------------------------------------------------------------|-------------------|
| Mehl 2011 <sup>4</sup>     | Descriptive Epidemiology | 6327            | 6-18 yr              | 3064 F / 3263 M runners                               | Injuries                      | <ul style="list-style-type: none"> <li>Overall annual injury was 30.7 injuries per 100,000 US population and increased 21.0% during the study period, from 24.2 injuries per 100,000 US population in 1994 to 29.3 injuries per 100,000 U.S. population in 2007.</li> <li>Children aged 12-14 yr had the highest injury rate, 45.8 injuries per 100,000 US population.</li> </ul>                                                                                                          | 4                 |
| Roberts 2010 <sup>18</sup> | Retrospective Cohort     | 310             | 7-17 yr              | 85 F / 225 M marathon runners                         | Medical encounters            | <ul style="list-style-type: none"> <li>310 youth successfully finished Twin Cities Marathon over 26 years with only 4 requiring post-race medical encounter.</li> <li>The risk for an acute race day medical attention in youths was less than, but not significantly different from adults (odds ratio =0.52, 95% CI: 0.19, 1.39).</li> </ul>                                                                                                                                             | 4                 |
| Rauh 2014 <sup>19</sup>    | Prospective Cohort       | 421             | 13-18 yr             | 186 F / 235 M high school cross country               | Injuries                      | <ul style="list-style-type: none"> <li>Age was not significantly different between runners who did (15.6±1.3 yr) and did not (15.6±1.1 yr) sustain an injury (P = 0.80).</li> <li>For girls, age was not significantly different between runners who did (15.7±1.2 yr) and did not (15.6±1.1 yr) sustain an injury. (P=0.65)</li> <li>For boys, age was not significantly different between runners who did (15.4±1.4 yr) and did not (15.6±1.2 yr) sustain an injury. (P=0.38)</li> </ul> | 2                 |
| Bennett 2001 <sup>20</sup> | Prospective Cohort       | 125             | 13-18 yr             | 68 F / 57 M high school cross country                 | Medial tibial stress syndrome | <ul style="list-style-type: none"> <li>Age was not significantly different between runners who did (15.3±1.0 yr) and did not (15.7±1.5 yr) develop medial tibial stress syndrome.</li> </ul>                                                                                                                                                                                                                                                                                               | 4                 |
| Huxley 2014 <sup>21</sup>  | Prospective Cohort       | 103             | 13-17 yr             | 66 F / 34 M / 3 Unidentified<br>Elite track and field | Injuries                      | <ul style="list-style-type: none"> <li>Injured athletes self-reported training at a higher weekly intensity and a higher yearly training load at 13-14 years (p&lt;0.01) compared to uninjured athletes</li> <li>Injured athletes reported training was 'harder' each week than uninjured athletes at 13-14 years (p&lt;0.01). and at 15-16 years (p&lt;0.05)</li> </ul>                                                                                                                   | 4                 |

**REFERENCES: TABLE 2 – AGE**

4. Mehl AJ, Nelson NG, McKenzie LB. Running-related injuries in school-age children and adolescents treated in emergency departments from 1994 through 2007. *Clin Pediatr (Phila)* 2011;50(2):126-32. doi: 10.1177/0009922810384719 [published Online First: 2010/10/20] [LOE 4]
18. Roberts WO, Nicholson WG. Youth marathon runners and race day medical risk over 26 years. *Clin J Sport Med* 2010;20(4):318-21. doi: 10.1097/JSM.0b013e3181e6301d [LOE 4]
19. Rauh MJ. Summer training factors and risk of musculoskeletal injury among high school cross-country runners. *J Orthop Sports Phys Ther* 2014;44(10):793-804. doi: 10.2519/jospt.2014.5378 [published Online First: 2014/09/05] [LOE 2]
20. Bennett JE, Reinking MF, Pluemer B, et al. Factors contributing to the development of medial tibial stress syndrome in high school runners. *J Orthop Sports Phys Ther* 2001;31(9):504-10. doi: 10.2519/jospt.2001.31.9.504 [LOE 4]
21. Huxley DJ, O'Connor D, Healey PA. An examination of the training profiles and injuries in elite youth track and field athletes. *Eur J Sport Sci* 2014;14(2):185-92. doi: 10.1080/17461391.2013.809153 [published Online First: 2013/06/19] [LOE 4]

TABLE 3 – SEX

| Author (Year)                 | Study Design             | No. of Subjects   | Population Age Range | Population Sex                                  | Outcome Measure                     | Summary                                                                                                                                                                                                                                                                                                                                              | Level of Evidence |
|-------------------------------|--------------------------|-------------------|----------------------|-------------------------------------------------|-------------------------------------|------------------------------------------------------------------------------------------------------------------------------------------------------------------------------------------------------------------------------------------------------------------------------------------------------------------------------------------------------|-------------------|
| Rauh 2006 <sup>14</sup>       | Prospective Cohort       | 421               | 14-18 yr             | 186 F / 235 M<br>high school<br>cross country   | Injuries                            | <ul style="list-style-type: none"> <li>Girls had a higher overall injury rate (19.6/1,000 AEs) than boys did (15.0/1,000 AE) (incidence rate ratio=1.3, 95% CI: 1.0, 1.6).</li> <li>Compared with boys, girls had significantly higher rates of injuries resulting in ≥15 days of disability (incidence rate ratio=3.2, 95% CI: 1.4-8.0).</li> </ul> | 2                 |
| Plisky 2006 <sup>16</sup>     | Prospective Cohort       | 105               | 13-18 yr             | 46 F / 59 M<br>high school<br>cross country     | Medial tibial stress syndrome       | <ul style="list-style-type: none"> <li>Overall injury rate for girls was 4.3/1000 AE and for boys was 1.7/1000 AE (rate ratio=2.5, 95% CI: 0.9, 8.2).</li> </ul>                                                                                                                                                                                     | 2                 |
| Tenforde 2013 <sup>17</sup>   | Prospective Cohort       | 748               | 13-18 yr             | 442 F / 306 M<br>high school<br>runners         | Stress fractures                    | <ul style="list-style-type: none"> <li>32 injuries occurred in 5.4% of girls (n=23).</li> <li>12 injuries occurred in 4.0% of boys (n=11).</li> </ul>                                                                                                                                                                                                | 2                 |
| Bennett 2001 <sup>20</sup>    | Prospective Cohort       | 125               | 13-18 yr             | 68 F / 57 M<br>high school<br>cross country     | Medial tibial stress syndrome       | <ul style="list-style-type: none"> <li>Injuries occurred in 19.6% of girls and 3.6% of boys.</li> <li>Sex was associated with medial tibial stress syndrome (<math>\chi^2=7.15</math>, <math>df=1</math>, <math>p=0.007</math> with 24% of the variability in occurrence of injury is due to sex).</li> </ul>                                        | 4                 |
| Tirabassi 2016 <sup>22</sup>  | Descriptive Epidemiology | National database | high school aged     | NA                                              | Injuries (medical disqualification) | <ul style="list-style-type: none"> <li>Medial disqualification injury rates were higher among girls than boys for cross country (rate ratio=2.6; 95% CI: 1.0, 7.5) and track and field (rate ratio=2.6; 95% CI: 1.7, 4.0).</li> </ul>                                                                                                                | 4                 |
| Changstrom 2015 <sup>23</sup> | Descriptive Epidemiology | 389               | 13-19 yr             | 210 F / 179 M<br>high school                    | Stress fractures                    | <ul style="list-style-type: none"> <li>Stress fracture injury rates for girls' cross country (10.62/100,000 AE) was higher than boys' cross country (5.42/100,000 AE) (rate ratio=1.75; 95% CI: 1.38, 2.23).</li> </ul>                                                                                                                              | 4                 |
| Reinking 2010 <sup>24</sup>   | Prospective Cohort       | 125               | 13-18 yr             | 62 F / 63 M<br>high school<br>cross country     | Exercise-related leg pain           | <ul style="list-style-type: none"> <li>No difference between girls and boys in occurrence of exercise-related leg pain (RR=0.93, 95% CI: 0.61, 1.42)</li> </ul>                                                                                                                                                                                      | 2                 |
| Rauh 2000 <sup>25</sup>       | Prospective Cohort       | 3233              | 14-18 yr             | 1202 F / 2031 M<br>high school<br>cross country | Injuries                            | <ul style="list-style-type: none"> <li>Girls had a higher injury rate (16.7/1,000 AE) than boys (10.9/1,000AE) (rate ratio=1.5, 95% CI: 1.4, 1.7).</li> <li>Girls had a higher rate of subsequent injury to the same body part (44.1/1,000 AE) than boys (37.6/1,000AE) (rate ratio=1.4, 95% CI: 1.2, 1.6).</li> </ul>                               | 2                 |

|                               |                             |        |                                         |                                                                                                                                            |          |                                                                                                                                                                                                                     |   |
|-------------------------------|-----------------------------|--------|-----------------------------------------|--------------------------------------------------------------------------------------------------------------------------------------------|----------|---------------------------------------------------------------------------------------------------------------------------------------------------------------------------------------------------------------------|---|
| Beachy<br>1997 <sup>26</sup>  | Descriptive<br>Epidemiology | 4,024  | 7 <sup>th</sup> -12 <sup>th</sup> grade | 787 F / 501 M<br>high school &<br>middle school<br>cross country<br><br>1531 F / 1205 M<br>high school &<br>middle school<br>track & field | Injuries | <ul style="list-style-type: none"> <li>• Cross country: Injury occurrence for boys was 48% and girls was 47.0%.</li> <li>• Track &amp; Field: Injury occurrence for boys was 48% and girls was 52.0%.</li> </ul>    | 4 |
| McLain<br>1989 <sup>27</sup>  | Descriptive<br>Epidemiology | 229    | 9 <sup>th</sup> -12 <sup>th</sup> grade | 40 F / 54 M<br>high school<br>cross country<br><br>65 F / 70 M<br>high school<br>track & field                                             | Injuries | <ul style="list-style-type: none"> <li>• Cross country: Injury occurrence for boys was 13.0% and girls was 7.5%.</li> <li>• Track &amp; Field: Injury occurrence for boys was 10.0% and girls was 18.5%.</li> </ul> | 4 |
| Lowe<br>1987 <sup>28</sup>    | Descriptive<br>Epidemiology | 634    | 9 <sup>th</sup> -12 <sup>th</sup> grade | 63 F / 125 M<br>high school<br>cross country<br><br>167 F / 279 M<br>high school<br>track & field                                          | Injuries | <ul style="list-style-type: none"> <li>• Cross country: Injury occurrence for boys was 1.6% and girls was 1.6%.</li> <li>• Track &amp; Field: Injury occurrence for boys was 1.4% and girls was 1.2%.</li> </ul>    | 4 |
| Chandy<br>1985 <sup>29</sup>  | Prospective<br>Cohort       | 12,920 | 9 <sup>th</sup> -12 <sup>th</sup> grade | 711 F / 1567 M<br>high school<br>cross country<br><br>4235 F / 6407 M<br>high school<br>track & field                                      | Injuries | <ul style="list-style-type: none"> <li>• Cross country: Injury occurrence for boys was 1.5% and girls was 1.1%.</li> <li>• Track &amp; Field: Injury occurrence for boys was 1.6% and girls was 1.1%.</li> </ul>    | 4 |
| Shively<br>1981 <sup>30</sup> | Prospective<br>Cohort       | 3,399  | 9 <sup>th</sup> -12 <sup>th</sup> grade | 187 F / 389 M<br>high school cross<br>country<br><br>1141 F / 1682 M<br>high school<br>track & field                                       | Injuries | <ul style="list-style-type: none"> <li>• Cross country: Injury occurrence for boys was 2.3% and girls was 0.0%.</li> <li>• Track &amp; Field: Injury occurrence for boys was 1.7% and girls was 0.7%.</li> </ul>    | 4 |

|                              |                          |       |                                         |                                                                                          |          |                                                                                                                                                                                                                                                                                                                        |   |
|------------------------------|--------------------------|-------|-----------------------------------------|------------------------------------------------------------------------------------------|----------|------------------------------------------------------------------------------------------------------------------------------------------------------------------------------------------------------------------------------------------------------------------------------------------------------------------------|---|
| Garrick 1978 <sup>31</sup>   | Prospective Cohort       | 167   | 9 <sup>th</sup> -12 <sup>th</sup> grade | 26 F / 141 M high school cross country                                                   | Injuries | <ul style="list-style-type: none"> <li>Injury occurrence for boys was 29.1% and girls was 34.6%.</li> </ul>                                                                                                                                                                                                            | 4 |
| Pierpoint 2016 <sup>32</sup> | Descriptive Epidemiology | NA    | 9 <sup>th</sup> -12 <sup>th</sup> grade | NA                                                                                       | Injuries | <ul style="list-style-type: none"> <li>Girls had higher overall injury rates (rate ratio=1.37; 95% CI: 1.27, 1.48) and practice injury rates (rate ratio=1.60; 95% CI: 1.46, 1.76) than boys.</li> </ul>                                                                                                               | 4 |
| Knowles 2006 <sup>33</sup>   | Prospective Cohort       | 2,269 | 9 <sup>th</sup> -12 <sup>th</sup> grade | 1266 F / 1003 M high school track & field                                                | Injuries | <ul style="list-style-type: none"> <li>Injury rates for girls was 1.18/1,000 AE (95% CI: 0.75, 1.83) and boys was 1.06/1,000 AE (95% CI: 0.62, 1.81).</li> </ul>                                                                                                                                                       | 2 |
| Watson 1987 <sup>34</sup>    | Prospective Cohort       | 234   | 9 <sup>th</sup> -12 <sup>th</sup> grade | 78 F / 156 M high school track & field                                                   | Injuries | <ul style="list-style-type: none"> <li>Injury occurrence for boys was 19.1% and girls was 14.1%.</li> </ul>                                                                                                                                                                                                            | 4 |
| Requa 1981 <sup>35</sup>     | Prospective Cohort       | 516   | 9 <sup>th</sup> -12 <sup>th</sup> grade | 208 F / 308 M high school track & field                                                  | Injuries | <ul style="list-style-type: none"> <li>Injury occurrence for boys was 32.8% and girls was 35.1%.</li> </ul>                                                                                                                                                                                                            | 4 |
| Beachy 2014 <sup>36</sup>    | Prospective Cohort       | 4,592 | 7 <sup>th</sup> -8 <sup>th</sup> grade  | 756 F / 710 M middle school cross country<br>1537 F / 1589 M middle school track & field | Injuries | <ul style="list-style-type: none"> <li>Cross-country: Girls had higher rate of injuries (10.9/1000 AE) than boys (8.0/1000 AE) (rate ratio=1.36, 95% CI 1.2, 1.6).</li> <li>Track &amp; Field: Girls had higher rate of injuries (12.2/1000 AE) than boys (8.3/1000 AE) (rate ratio=1.46, 95% CI 1.2, 1.6).</li> </ul> | 4 |

CI, confidence interval; AE, athletic exposure

## REFERENCES: TABLE 3 – SEX

14. Rauh MJ, Koepsell TD, Rivara FP, et al. Epidemiology of musculoskeletal injuries among high school cross-country runners. *Am J Epidemiol* 2006;163(2):151-9. doi: 10.1093/aje/kwj022 [published Online First: 2005/11/23] [LOE 2]
16. Plisky MS, Rauh MJ, Heiderscheid B, et al. Medial tibial stress syndrome in high school cross-country runners: incidence and risk factors. *J Orthop Sports Phys Ther* 2007;37(2):40-7. doi: 10.2519/jospt.2007.2343 [LOE 2]
17. Tenforde AS, Sayres LC, McCurdy ML, et al. Identifying sex-specific risk factors for stress fractures in adolescent runners. *Med Sci Sports Exerc* 2013;45(10):1843-51. doi: 10.1249/MSS.0b013e3182963d75 [LOE 2]
20. Bennett JE, Reinking MF, Pluemer B, et al. Factors contributing to the development of medial tibial stress syndrome in high school runners. *J Orthop Sports Phys Ther* 2001;31(9):504-10. doi: 10.2519/jospt.2001.31.9.504 [LOE 4]
22. Tirabassi J, Brou L, Khodae M, et al. Epidemiology of High School Sports-Related Injuries Resulting in Medical Disqualification: 2005-2006 Through 2013-2014 Academic Years. *Am J Sports Med* 2016;44(11):2925-32. doi: 10.1177/0363546516644604 [published Online First: 2016/05/10] [LOE 4]
23. Changstrom BG, Brou L, Khodae M, et al. Epidemiology of stress fracture injuries among US high school athletes, 2005-2006 through 2012-2013. *Am J Sports Med* 2015;43(1):26-33. doi: 10.1177/0363546514562739 [published Online First: 2014/12/05] [LOE 4]
24. Reinking MF, Austin TM, Hayes AM. Risk factors for self-reported exercise-related leg pain in high school cross-country athletes. *J Athl Train* 2010;45(1):51-7. doi: 10.4085/1062-6050-45.1.51 [LOE 2]
25. Rauh MJ, Margherita AJ, Rice SG, et al. High school cross country running injuries: a longitudinal study. *Clin J Sport Med* 2000;10(2):110-6. doi: 10.1097/00042752-200004000-00005 [LOE 2]
26. Beachy G, Akau CK, Martinson M, et al. High school sports injuries. A longitudinal study at Punahou School: 1988 to 1996. *Am J Sports Med* 1997;25(5):675-81. doi: 10.1177/036354659702500515 [LOE 2]
27. McLain LG, Reynolds S. Sports injuries in a high school. *Pediatrics* 1989;84(3):446-50. [LOE 4]
28. Lowe EB, Perkins ER, Herndon JH. Rhode Island high school athletic injuries 1985-86. *R I Med J* 1987;70(6):265-70. [LOE 4]
29. Chandy TA, Grana WA. SECONDARY SCHOOL ATHLETIC INJURY IN BOYS AND GIRLS: A THREE-YEAR COMPARISON. *Journal of Pediatric Orthopaedics* 1985;5(5):629. [LOE 4]
30. Shively RA, Grana WA, Ellis D. High School Sports Injuries. *Phys Sportsmed* 1981;9(8):46-50. doi: 10.1080/00913847.1981.11711135. [LOE 4]
31. Garrick JG, Requa RK. Injuries in high school sports. *Pediatrics* 1978;61(3):465-9. doi: 10.1542/peds.61.3.465 [LOE 4]
32. Pierpoint LA, Williams CM, Fields SK, et al. Epidemiology of Injuries in United States High School Track and Field: 2008-2009 Through 2013-2014. *Am J Sports Med* 2016;44(6):1463-8. doi: 10.1177/0363546516629950 [published Online First: 2016/02/26] [LOE 4]
33. Knowles SB, Marshall SW, Bowling JM, et al. A prospective study of injury incidence among North Carolina high school athletes. *Am J Epidemiol* 2006;164(12):1209-21. doi: 10.1093/aje/kwj337 [published Online First: 2006/09/29] [LOE 4]
34. Watson MD, DiMartino PP. Incidence of injuries in high school track and field athletes and its relation to performance ability. *Am J Sports Med* 1987;15(3):251-4. doi: 10.1177/036354658701500310 [LOE 4]
35. Requa RK, Garrick JG. Injuries in Interscholastic Track and Field. *Phys Sportsmed* 1981;9(3):42-9. doi: 10.1080/00913847.1981.11711030 [LOE 4]
36. Beachy G, Rauh M. Middle School Injuries: A 20-Year (1988–2008) Multisport Evaluation. *Journal of Athletic Training* 2014;49(4):493-506. doi: 10.4085/1062-6050-49.2.19 [LOE 4]



TABLE 4 – PREVIOUS INJURY

| Author (Year)               | Study Design       | No. of Subjects | Population Age Range | Population Sex                               | Outcome Measure           | Summary                                                                                                                                                                                                                                                                                                                                                                                                                           | Level of Evidence |
|-----------------------------|--------------------|-----------------|----------------------|----------------------------------------------|---------------------------|-----------------------------------------------------------------------------------------------------------------------------------------------------------------------------------------------------------------------------------------------------------------------------------------------------------------------------------------------------------------------------------------------------------------------------------|-------------------|
| Rauh 2006 <sup>14</sup>     | Prospective Cohort | 421             | 14-18 yr             | 186 F / 235 M<br>high school cross country   | Injuries                  | <ul style="list-style-type: none"> <li>Overall injury rate of 17.0/1000 AE</li> <li>Overall rate of re-injury to same body part was highest in the shin (73.6/1000 AE), hip (53.8/1000 AE) and knee (41.8/1000 AE)</li> <li>Previous injury (adjusted RR 1.2, 95% CI: 1.0, 1.5) and summer preseason injury (adjusted RR 1.4, 95% CI: 1.0, 1.9) were associated with future injury</li> </ul>                                     | 2                 |
| Plisky 2006 <sup>16</sup>   | Prospective Cohort | 105             | 13-18 yr             | 46 F / 59 M<br>high school cross country     | MTSS                      | <ul style="list-style-type: none"> <li>Overall MTSS injury rate of 2.8/1000 AE</li> <li>Runners with a previous injury were at greater odds (OR=2.2, 0.7, 6.4) of developing MTSS than runners without prior injury.</li> </ul>                                                                                                                                                                                                   | 2                 |
| Tenforde 2013 <sup>17</sup> | Prospective Cohort | 748             | 13-18 yr             | 442 F: / 306 M<br>high school runners        | Stress fractures          | <ul style="list-style-type: none"> <li>Stress fractures occurred in 5.4% of girls (n = 23) and 4.0% of boys (n = 11).</li> <li>Prior fracture was an independent risk factor for stress fractures in girls (HR 5.83, 95% CI: 2.32, 14.67) and boys (HR 5.73, 95% CI: 1.52, 21.67).</li> </ul>                                                                                                                                     | 2                 |
| Reinking 2010 <sup>24</sup> | Prospective Cohort | 125             | 13-18 yr             | 62 F / 63 M<br>high school cross country     | Exercise-related leg pain | <ul style="list-style-type: none"> <li>103/125 respondents (82.4%) reported a history of exercise-related leg pain.</li> <li>45/93 respondents (48%) reported experiencing exercise-related leg pain during the season.</li> <li>Runners with a history of exercise-related leg pain were at 9 times greater risk of exercise-related leg pain during the season (RR=9.14, 1.36-61.59) than runners without a history.</li> </ul> | 2                 |
| Rauh 2000 <sup>25</sup>     | Prospective Cohort | 3233            | 14-18 yr             | 1202 F / 2031 M<br>high school cross country | Injuries                  | <ul style="list-style-type: none"> <li>Initial injury rate was 8.7/1,000 AE.</li> <li>Subsequent injury rates were 37.6/1,000 AE to the same body part and 3.7/1,000 AE to a new body part.</li> </ul>                                                                                                                                                                                                                            | 2                 |

AE, athletic exposure; RR, rate ratio; OR, odds ratio; HR, hazard ratio; CI, confidence interval

**REFERENCES: TABLE 4 – PREVIOUS INJURY**

14. Rauh MJ, Koepsell TD, Rivara FP, et al. Epidemiology of musculoskeletal injuries among high school cross-country runners. *Am J Epidemiol* 2006;163(2):151-9. doi: 10.1093/aje/kwj022 [published Online First: 2005/11/23] [LOE 2]
16. Plisky MS, Rauh MJ, Heiderscheid B, et al. Medial tibial stress syndrome in high school cross-country runners: incidence and risk factors. *J Orthop Sports Phys Ther* 2007;37(2):40-7. doi: 10.2519/jospt.2007.2343 [LOE 2]
17. Tenforde AS, Sayres LC, McCurdy ML, et al. Identifying sex-specific risk factors for stress fractures in adolescent runners. *Med Sci Sports Exerc* 2013;45(10):1843-51. doi: 10.1249/MSS.0b013e3182963d75 [LOE 2]
24. Reinking MF, Austin TM, Hayes AM. Risk factors for self-reported exercise-related leg pain in high school cross-country athletes. *J Athl Train* 2010;45(1):51-7. doi: 10.4085/1062-6050-45.1.51 [LOE 2]
25. Rauh MJ, Margherita AJ, Rice SG, et al. High school cross country running injuries: a longitudinal study. *Clin J Sport Med* 2000;10(2):110-6. doi: 10.1097/00042752-200004000-00005 [LOE 2]

TABLE 5 – ALIGNMENT and STRENGTH

| Author (Year)              | Study Design       | No. of Subjects | Population Age Range | Population Sex                             | Outcome Measure                                             | Summary                                                                                                                                                                                                                                                                                                                                                                                                                                           | Level of Evidence |
|----------------------------|--------------------|-----------------|----------------------|--------------------------------------------|-------------------------------------------------------------|---------------------------------------------------------------------------------------------------------------------------------------------------------------------------------------------------------------------------------------------------------------------------------------------------------------------------------------------------------------------------------------------------------------------------------------------------|-------------------|
| Yagi 2013 <sup>15</sup>    | Cohort             | 230             | 14-18 yr             | 96 F / 134 M<br>high school cross country  | Shin pain (Medial tibial stress syndrome & stress fracture) | <ul style="list-style-type: none"> <li>Increased internal rotation of the hip significantly decreased the odds of sustaining medial tibial stress syndrome in females (adjusted OR=0.91; 95% CI: 0.85, 0.99).</li> <li>Increased straight leg raise significantly increased the risk of stress fracture in males (adjusted OR=1.38; 95 % CI: 1.04, 1.83).</li> </ul>                                                                              | 4                 |
| Plisky 2006 <sup>16</sup>  | Prospective Cohort | 105             | 13-18 yr             | 46 F / 59 M<br>high school cross country   | Medial tibial stress syndrome                               | <ul style="list-style-type: none"> <li>Runners with a navicular drop &gt;10mm were at the same risk (OR=0.9; 95% CI: 0.3, 2.8) than runners with a navicular drop &lt;10mm.</li> </ul>                                                                                                                                                                                                                                                            | 2                 |
| Rauh 2007 <sup>37</sup>    | Prospective Cohort | 393             | 14-18 yrs            | 171 F / 222 M<br>high school cross country | Injuries                                                    | <ul style="list-style-type: none"> <li>Runners with a Q-angle <math>\geq 20^\circ</math> had higher risk of injury than runners with a Q-angle <math>&lt; 20^\circ</math> (rate ratio=1.7; 95% CI: 1.2, 2.4).</li> <li>Runners with a right-left Q-angle difference <math>\geq 4^\circ</math> had a higher injury risk than runners with a right-left Q-angle difference <math>&lt; 4^\circ</math> (rate ratio=1.8; 95% CI: 1.4, 2.5).</li> </ul> | 2                 |
| Rauh 2018 <sup>38</sup>    | Prospective Cohort | 393             | 14-18 yrs            | 171 F / 222 M<br>high school cross country | Injuries                                                    | <ul style="list-style-type: none"> <li>Boys with a leg-length inequality &gt;1.5 cm had higher odds of injury than boys with a leg-length inequality &lt;0.5 cm (OR=7.47, 95% CI: 1.5, 36.9).</li> </ul>                                                                                                                                                                                                                                          | 4                 |
| Luedke 2015 <sup>39</sup>  | Prospective Cohort | 68              | 13-18 yrs            | 47 F / 20 M<br>high school cross country   | Injuries                                                    | <ul style="list-style-type: none"> <li>Runners in the tertiles indicating weakest hip abductors (p=0.046), knee extensor (p=0.038), and hip knee flexor muscle strength (p=0.046) had higher occurrence of anterior knee pain.</li> </ul>                                                                                                                                                                                                         | 2                 |
| Finnoff 2011 <sup>40</sup> | Prospective Cohort | 98              | 14-18 yrs            | 45 F / 53 M<br>high school cross country   | Patellofemoral pain                                         | <ul style="list-style-type: none"> <li>Greater baseline hip abduction strength (OR=5.35, 95% CI: 1.46-19.53) and abduction-to-adduction strength ratio (OR=14.14, 95% CI: 0.90, 221.06) increased the odds of patellofemoral pain.</li> <li>Greater pre-injury hip ER:IR strength ratio decreased the odds of patellofemoral pain (OR=0.01, 95% CI: &lt;0.01, 0.44).</li> </ul>                                                                   | 2                 |

CI, confidence interval; OR, odds ratio

**REFERENCES: TABLE 5 – ALIGNMENT and STRENGTH**

15. Yagi S, Muneta T, Sekiya I. Incidence and risk factors for medial tibial stress syndrome and tibial stress fracture in high school runners. *Knee Surg Sports Traumatol Arthrosc* 2013;21(3):556-63. doi: 10.1007/s00167-012-2160-x [published Online First: 2012/08/09] [LOE 4]
16. Plisky MS, Rauh MJ, Heiderscheid B, et al. Medial tibial stress syndrome in high school cross-country runners: incidence and risk factors. *J Orthop Sports Phys Ther* 2007;37(2):40-7. doi: 10.2519/jospt.2007.2343 [LOE 2]
37. Rauh MJ, Koepsell TD, Rivara FP, et al. Quadriceps angle and risk of injury among high school cross-country runners. *J Orthop Sports Phys Ther* 2007;37(12):725-33. doi: 10.2519/jospt.2007.2453 [published Online First: 2007/08/29] [LOE 2]
38. Rauh MJ. LEG-LENGTH INEQUALITY AND RUNNING-RELATED INJURY AMONG HIGH SCHOOL RUNNERS. *Int J Sports Phys Ther* 2018;13(4):643-51. [LOE 2]
39. Luedke LE, Heiderscheid BC, Williams DS, et al. ASSOCIATION OF ISOMETRIC STRENGTH OF HIP AND KNEE MUSCLES WITH INJURY RISK IN HIGH SCHOOL CROSS COUNTRY RUNNERS. *Int J Sports Phys Ther* 2015;10(6):868-76.[LOE 2]
40. Finnoff JT, Hall MM, Kyle K, et al. Hip strength and knee pain in high school runners: a prospective study. *PM R* 2011;3(9):792-801. doi: 10.1016/j.pmrj.2011.04.007 [published Online First: 2011/08/06] [LOE2]

TABLE 6 - BONE STRESS INJURY

| Author (Year)                 | Study Design             | No. of Subjects | Population Age Range | Population Sex                        | Outcome Measure  | Summary                                                                                                                                                                                                                                                                                                                                                                                                                                                                                                                                                                                                                                                                                                                                                                                             | Level of Evidence |
|-------------------------------|--------------------------|-----------------|----------------------|---------------------------------------|------------------|-----------------------------------------------------------------------------------------------------------------------------------------------------------------------------------------------------------------------------------------------------------------------------------------------------------------------------------------------------------------------------------------------------------------------------------------------------------------------------------------------------------------------------------------------------------------------------------------------------------------------------------------------------------------------------------------------------------------------------------------------------------------------------------------------------|-------------------|
| Tenforde 2013 <sup>17</sup>   | Prospective Cohort       | 748             | 13-18 yr             | 442 F / 306 M<br>high school          | Stress fractures | <ul style="list-style-type: none"> <li>Prospective stress fractures in 5.4% of girls (n = 23) and 4.0% of boys (n = 11).</li> <li>Tibial stress fractures were most common in girls, and the metatarsus was most frequently fractured in boys.</li> <li>Independent risk factors for stress fractures in girls included: prior fracture (HR 5.83, 95% CI: 2.32, 14.67), body mass index &lt; 19 kg/m<sup>2</sup>, (HR 2.67, 95% CI: 1.11, 6.41) late menarche (age menarche ≥15 yr), (HR 2.49, 95% CI: 1.01, 6.17) and previous participation in gymnastics or dance (HR 3.13, 95% CI: 1.20, 9.15).</li> <li>Independent risk factors for stress fractures in boys included prior fracture (HR 5.73, 95% CI: 1.52, 21.67) and increased number of seasons (HR 2.35, 95% CI: 1.12, 5.00).</li> </ul> | 2                 |
| Changstrom 2015 <sup>23</sup> | Descriptive Epidemiology | 389             | 13-19 yr             | 210 F / 179 M<br>high school athletes | Stress fractures | <ul style="list-style-type: none"> <li>Overall stress fracture injury rate of 1.54/100,000 AE.</li> <li>The most commonly injured sites were the lower leg (40.3% of all stress fractures), foot (34.9%), and lower back/lumbar spine/pelvis (15.2%).</li> <li>Stress fracture injury rates were 10.62/100,000 AE for girls' cross country and 5.42/100,000 for boys' cross country.</li> <li>Girls sustained more stress fractures (63.3%) than boys (36.7%) and had higher rates of stress fracture (2.22 vs 1.27; rate ratio, 1.75; 95% CI: 1.38, 2.23).</li> </ul>                                                                                                                                                                                                                              | 4                 |
| Field 2011 <sup>44</sup>      | Prospective Cohort       | 6831            | 9-15 yr              | 6831 F<br>adolescents                 | Stress fractures | <ul style="list-style-type: none"> <li>During seven years of follow-up, 267 females (3.9%) developed a stress fracture.</li> <li>Hours per week of running (RR=1.13, 95% CI: 1.04, 1.23), basketball (RR=1.12, 95% CI 1.03, 1.22) and cheerleading and gymnastics (RR=1.12, 95% CI 1.02, 1.23) were significant predictors of developing a stress fracture independent of age, age at menarche, family history of fracture, and hours per week of low- and moderate-impact activity.</li> </ul>                                                                                                                                                                                                                                                                                                     | 2                 |

BMD, bone mineral density; RR, relative risk; HR, hazard ratio; CI, confidence interval; AE = athletic exposure

**REFERENCES: TABLE 6 - BONE STRESS INJURY**

17. Tenforde AS, Sayres LC, McCurdy ML, et al. Identifying sex-specific risk factors for stress fractures in adolescent runners. *Med Sci Sports Exerc* 2013;45(10):1843-51. doi: 10.1249/MSS.0b013e3182963d75 [LOE 2]
23. Changstrom BG, Brou L, Khodae M, et al. Epidemiology of stress fracture injuries among US high school athletes, 2005-2006 through 2012-2013. *Am J Sports Med* 2015;43(1):26-33. doi: 10.1177/0363546514562739 [published Online First: 2014/12/05] [LOE 4]
44. Field AE, Gordon CM, Pierce LM, et al. Prospective study of physical activity and risk of developing a stress fracture among preadolescent and adolescent girls. *Arch Pediatr Adolesc Med* 2011;165(8):723-8. doi: 10.1001/archpediatrics.2011.34 [published Online First: 2011/04/04] [LOE 2]

TABLE 7 - LOW BMD and MENSTRUAL DYSFUNCTION

| Author (Year)               | Study Design       | No. of Subjects | Population Age Range | Population Sex                           | Outcome Measures                   | Summary                                                                                                                                                                                                                                                                                                                                                                                                                                                                                                                                                                                                                                                                                                                                                                                                                                                                                                                                                                                                                                                                                                                                                                                         | Level of Evidence |
|-----------------------------|--------------------|-----------------|----------------------|------------------------------------------|------------------------------------|-------------------------------------------------------------------------------------------------------------------------------------------------------------------------------------------------------------------------------------------------------------------------------------------------------------------------------------------------------------------------------------------------------------------------------------------------------------------------------------------------------------------------------------------------------------------------------------------------------------------------------------------------------------------------------------------------------------------------------------------------------------------------------------------------------------------------------------------------------------------------------------------------------------------------------------------------------------------------------------------------------------------------------------------------------------------------------------------------------------------------------------------------------------------------------------------------|-------------------|
| Rauh 2014 <sup>45</sup>     | Prospective Cohort | 89              | 13-18 yr             | 89 F high school cross country and track | Musculoskeletal injuries           | <ul style="list-style-type: none"> <li>Low BMD relative to age (BMD Z-score of <math>\leq -1</math>SD) was significantly associated (adjusted OR=4.6, 95% CI: 1.5, 13.3) with increased injury occurrence.</li> <li>Among those with BMD Z-score of <math>\leq -2</math>SD, a history of oligo/amenorrhea was significantly associated (adjusted OR=4.1, 95% CI: 1.2, 13.5) with increased injury occurrence.</li> </ul>                                                                                                                                                                                                                                                                                                                                                                                                                                                                                                                                                                                                                                                                                                                                                                        | 2                 |
| Barrack 2017 <sup>47</sup>  | Cross-sectional    | 69              | 13-19 yr             | 51 M athletes                            | Low BMD (BMD Z-score $\leq -1.0$ ) | <ul style="list-style-type: none"> <li>Single risk factors of low BMD included <math>&lt;85\%</math> expected weight (OR=5.6, 95% CI: 1.4, 22.5) and average weekly mileage <math>&gt;30</math> in the past year (OR=6.4, 95% CI: 1.5, 27.1).</li> <li>The strongest two-variable and three-variable risk factors included weekly mileage <math>&gt;30</math> + stress fracture history (OR=17.3, 95% CI: 1.6, 185.6) and weekly mileage <math>&gt;30</math> + <math>&lt;85\%</math> expected weight + stress fracture history (OR=17.3, 95% CI: 1.6, 185.6), respectively.</li> <li>Risk factors were cumulative when predicting low BMD (including <math>&lt;85\%</math> expected weight, weekly mileage <math>&gt;30</math>, stress fracture history and <math>&lt;1</math> serving of calcium-rich food/day): 0-1 risk factors (11.1%), 2 risk factors (42.9%), or 3-4 risk factors (80.0%).</li> </ul>                                                                                                                                                                                                                                                                                     | 4                 |
| Tenforde 2015 <sup>48</sup> | Cross-sectional    | 136             | 13-19 yr             | 94 F / 42 M high school runners          | BMD Z-score                        | <ul style="list-style-type: none"> <li>In girls, risk factors for lower lumbar BMD Z-scores included: lower android-to-gynoid fat mass ratio (<math>\beta=0.49</math>), higher fat mass (<math>\beta=-0.30</math>), being shorter (<math>\beta=0.33</math>), and the interaction between current menstrual irregularity and a history of fracture (<math>\beta=-1.18</math>).</li> <li>In girls, risk factors for lower total body less head BMD Z-scores included: later age of menarche (<math>\beta=-0.26</math>), lower android-to-gynoid fat mass ratio (<math>\beta=0.17</math>), lower lean mass (<math>\beta=0.33</math>), and drinking less milk (<math>\beta=0.19</math>).</li> <li>In boys, risk factors for lower lumbar BMD Z-scores included: lower BMI Z-score (<math>\beta=0.57</math>) and the belief that being thinner improves performance (<math>\beta=-0.90</math>).</li> <li>In boys, risk factors for lower total body less head BMD Z-scores included: lower BMI Z-score (<math>\beta=0.60</math>) and the belief that being thinner improves performance (<math>\beta=-0.46</math>), and lower android-to-gynoid fat mass ratio (<math>\beta=0.25</math>).</li> </ul> | 2                 |

|                            |                    |     |          |                             |                    |                                                                                                                                                                                                                                                                                                                                                                                                                                                                                                                                                                                                                                                                                                               |   |
|----------------------------|--------------------|-----|----------|-----------------------------|--------------------|---------------------------------------------------------------------------------------------------------------------------------------------------------------------------------------------------------------------------------------------------------------------------------------------------------------------------------------------------------------------------------------------------------------------------------------------------------------------------------------------------------------------------------------------------------------------------------------------------------------------------------------------------------------------------------------------------------------|---|
|                            |                    |     |          |                             |                    | <ul style="list-style-type: none"> <li>Girls with a BMI <math>\leq 17.5</math> kg/m<sup>2</sup> or both menstrual irregularity and a history of fracture more frequently had BMD Z-score <math>\leq -1.0</math>.</li> <li>Boys with a BMI <math>\leq 17.5</math> kg/m<sup>2</sup> and belief that thinness improves performance more frequently had BMD Z-score <math>\leq -1.0</math>.</li> </ul>                                                                                                                                                                                                                                                                                                            |   |
| Barrack 2014 <sup>50</sup> | Prospective Cohort | 259 | 13-29 yr | 56 F (age < 18 yr) athletes | Bone stress injury | <ul style="list-style-type: none"> <li>28 participants (10.8%) developed a bone stress injury.</li> <li>Single factors associated with the development of bone stress injury included <math>\geq 12</math> h/wk of purposeful exercise (OR=4.9; 95% CI: 1.4, 16.9), BMI &lt;21.0 kg/m<sup>2</sup> (OR=2.4; 95% CI: 1.0, 5.3), and BMD Z score &lt;-1.0 (OR=3.2; 95% CI: 1.4, 7.2).</li> <li>The strongest 2- and 3-variable combined risk factors for bone stress injury were low BMD (Z score &lt;-1.0) + <math>\geq 12</math> h/wk of exercise (OR=5.1; 95% CI: 2.2, 12.1) and <math>\geq 12</math> h/wk of exercise + leanness sport/activity + dietary restraint (OR, 8.7; 95% CI: 2.7, 28.3).</li> </ul> | 2 |

BMI, body mass index; BMD, bone mineral density; OR, odds ratio;  $\beta$ =beta coefficient; CI, confidence interval



**REFERENCES: TABLE 7 - LOW BMD and MENSTRUAL DYSFUNCTION**

45. Rauh MJ, Barrack M, Nichols JF. Associations between the female athlete triad and injury among high school runners. *Int J Sports Phys Ther* 2014;9(7):948-58. [LOE 2]
47. Barrack MT, Fredericson M, Tenforde AS, et al. Evidence of a cumulative effect for risk factors predicting low bone mass among male adolescent athletes. *Br J Sports Med* 2017;51(3):200-05. doi: 10.1136/bjsports-2016-096698 [LOE 4]
48. Tenforde AS, Fredericson M, Sayres LC, et al. Identifying sex-specific risk factors for low bone mineral density in adolescent runners. *Am J Sports Med* 2015;43(6):1494-504. doi: 10.1177/0363546515572142 [published Online First: 2015/03/06] [LOE 2]
50. Barrack MT, Gibbs JC, De Souza MJ, et al. Higher incidence of bone stress injuries with increasing female athlete triad-related risk factors: a prospective multisite study of exercising girls and women. *Am J Sports Med* 2014;42(4):949-58. doi: 10.1177/0363546513520295 [published Online First: 2014/02/24] [LOE 2]

TABLE 8 – TRAINING

| Author (Year)               | Study Design         | No. of Subjects | Population Age Range | Population Sex                                                     | Outcome Measure     | Summary                                                                                                                                                                                                                                                                                                                                                                                                                                                                                                                                                                                                                       | Level of Evidence |
|-----------------------------|----------------------|-----------------|----------------------|--------------------------------------------------------------------|---------------------|-------------------------------------------------------------------------------------------------------------------------------------------------------------------------------------------------------------------------------------------------------------------------------------------------------------------------------------------------------------------------------------------------------------------------------------------------------------------------------------------------------------------------------------------------------------------------------------------------------------------------------|-------------------|
| Rauh 2006 <sup>14</sup>     | Prospective Cohort   | 421             | 14-18 yr             | 186 F / 235 M<br>high school<br>cross country                      | Injuries            | <ul style="list-style-type: none"> <li>No association to injury risk for: running experience, pre-season number of weeks, pre-season frequency d/wk, pre-season average weekly distance, training pace, training surface or terrain.</li> </ul>                                                                                                                                                                                                                                                                                                                                                                               | 2                 |
| Rauh 2014 <sup>19</sup>     | Prospective Cohort   | 421             | 14-18 yr             | 186 F / 235 M<br>high school<br>cross country                      | Injuries            | <ul style="list-style-type: none"> <li>Runners who ran &lt;8 wks during summer had higher odds of incurring injury during first month of season (OR=2.7, 95% CI 1.2, 5.8).</li> <li>Runners who only alternated mileage 25% or less during summer had higher odds of incurring injury during the first month of season (OR=3.0, 95% CI 1.4, 6.4).</li> <li>Runners who ran predominantly on hills &gt;33% each run (OR=12.3, 95% CI: 2.9, 52.5) or flat irregular terrains &gt;33% each run (OR=12.3, 95% CI: 2.2, 6.2) had higher odds of incurring an injury during first month of season for girl runners only.</li> </ul> | 2                 |
| Huxley 2014 <sup>21</sup>   | Prospective Cohort   | 103             | 13-17 yr             | 66 F / 34 M / 3<br>Unidentified<br><br>Elite track and<br>field    | Injuries            | <ul style="list-style-type: none"> <li>Injured athletes trained at a higher intensity at 13-14 years, completed more high-intensity training sessions at 13-14 years and 15-16 years, and had a higher yearly training load at 13-14 years.</li> </ul>                                                                                                                                                                                                                                                                                                                                                                        | 4                 |
| Luedke 2016 <sup>51</sup>   | Prospective Cohort   | 68              | 13-18 yrs            | 47 F / 20 M<br>high school<br>cross country                        | Injuries            | <ul style="list-style-type: none"> <li>Runners with step rate &lt; 166 steps/min at self-selected running speed were at greater odds of incurring a shin injury (OR=5.85, 95% CI: 1.1-32.1).</li> <li>Runners with step rate ≤ 164 steps /min at fixed running speed (3.3 m/s) were more likely to incur shin injury (OR=6.67, 95% CI: 1.2-36.7).</li> </ul>                                                                                                                                                                                                                                                                  | 2                 |
| Timpka 2015 <sup>52</sup>   | Prospective Cohort   | 110             | mean age =17<br>yrs  | 64 F / 46 M<br>Swedish track<br>and field                          | Overuse<br>injuries | <ul style="list-style-type: none"> <li>In assessing training load index (reported intensity x minutes of training per week), athletes in the third quartile (HR=1.76, 95% CI: 1.13-2.76, p=0.013) and fourth quartile (HR=1.81, 95% CI 1.18-2.80, p=0.007) had almost twice the risk of overuse injury compared to their peers in in the first quartile.</li> </ul>                                                                                                                                                                                                                                                           | 4                 |
| Tenforde 2011 <sup>53</sup> | Retrospective Cohort | 748             | 13-18 yrs            | 442 F / 306 M<br>high school<br>cross country &<br>track and field | Overuse<br>injuries | <ul style="list-style-type: none"> <li>Compared to girls with no injury, girls with previous injury reported a greater percentage of miles on pavement (55% vs 49%).</li> <li>Compared to boys with no injury, boys with previous injury reported greater average weekly miles over past year (17.1±11.9 vs 14.1 ± 11.5 miles).</li> </ul>                                                                                                                                                                                                                                                                                    | 3                 |

CI, confidence interval; OR, odds ratio; HR, hazard ratio

**REFERENCES: TABLE 8 – TRAINING**

14. Rauh MJ, Koepsell TD, Rivara FP, et al. Epidemiology of musculoskeletal injuries among high school cross-country runners. *Am J Epidemiol* 2006;163(2):151-9. doi: 10.1093/aje/kwj022 [published Online First: 2005/11/23] [LOE 2]
19. Rauh MJ. Summer training factors and risk of musculoskeletal injury among high school cross-country runners. *J Orthop Sports Phys Ther* 2014;44(10):793-804. doi: 10.2519/jospt.2014.5378 [published Online First: 2014/09/05] [LOE 2]
21. Huxley DJ, O'Connor D, Healey PA. An examination of the training profiles and injuries in elite youth track and field athletes. *Eur J Sport Sci* 2014;14(2):185-92. doi: 10.1080/17461391.2013.809153 [published Online First: 2013/06/19] [LOE 4]
51. Luedke LE, Heiderscheit BC, Williams DS, et al. Influence of Step Rate on Shin Injury and Anterior Knee Pain in High School Runners. *Med Sci Sports Exerc* 2016;48(7):1244-50. doi: 10.1249/MSS.0000000000000890 [LOE 2]
52. Timpka T, Jacobsson J, Dahlström Ö, et al. The psychological factor 'self-blame' predicts overuse injury among top-level Swedish track and field athletes: a 12-month cohort study. *Br J Sports Med* 2015;49(22):1472-7. doi: 10.1136/bjsports-2015-094622 [published Online First: 2015/09/15] [LOE 4]
53. Tenforde AS, Sayres LC, McCurdy ML, et al. Overuse injuries in high school runners: lifetime prevalence and prevention strategies. *PMR* 2011;3(2):125-31; quiz 31. doi: 10.1016/j.pmrj.2010.09.009 [LOE 3]

TABLE 9 – FOOTWEAR and FOOTSTRIKE

| Author (Year)                | Study Design                  | No. of Subjects | Population Age Range | Population Sex          | Outcome Measure         | Summary                                                                                                                                                                                                                                                                                                                                                                                                                                                                                                                                                                                                           | Level of Evidence |
|------------------------------|-------------------------------|-----------------|----------------------|-------------------------|-------------------------|-------------------------------------------------------------------------------------------------------------------------------------------------------------------------------------------------------------------------------------------------------------------------------------------------------------------------------------------------------------------------------------------------------------------------------------------------------------------------------------------------------------------------------------------------------------------------------------------------------------------|-------------------|
| Aibast 2017 <sup>57</sup>    | Observational                 | 76              | 12-18 yr             | 38 F / 38 M adolescents | Injuries                | <ul style="list-style-type: none"> <li>Lower-limb injury prevalence was 8% in habitually barefoot and 61% in habitually shod participants (<math>p = 0.01</math>).</li> <li>Habitually barefoot participants spent more time engaged in moderate to vigorous physical activity compared to habitually shod subjects (60+26 min/d vs 31+13 min/d; <math>p &lt; 0.001</math>)</li> </ul>                                                                                                                                                                                                                            | 3                 |
| Hollander 2018 <sup>62</sup> | Cross-sectional observational | 678             | 6-18 yr              | 335 F / 343 M children  | Rearfoot strike pattern | <ul style="list-style-type: none"> <li>Habitually barefoot children showed a higher probability of using a rearfoot strike than habitually shod children (<math>p &lt; 0.001</math>).</li> <li>The probability of rearfoot strike decreased in habitually barefoot children with age (OR<sub>barefoot-jogging</sub> = 0.82, 95% CI: 0.71, 0.96; OR<sub>barefoot-running</sub> = 0.58, 95% CI: 0.50, 0.67; OR<sub>shod-running</sub> = 0.68, 95% CI, 0.59, 0.79).</li> <li>In habitually shod children, the probability of rearfoot strike increased during shod jogging (OR=1.19, 95% CI: 1.05, 1.35).</li> </ul> | 3                 |

OR, odds ratio; CI, confidence interval

**REFERENCES: TABLE 9 – FOOTWEAR and FOOTSTRIKE**

57. Aibast H, Okutoyi P, Sigei T, et al. Foot Structure and Function in Habitually Barefoot and Shod Adolescents in Kenya. *Curr Sports Med Rep* 2017;16(6):448-58. doi: 10.1249/JSR.0000000000000431 [LOE 3]
62. Hollander K, de Villiers JE, Venter R, et al. Foot Strike Patterns Differ Between Children and Adolescents Growing up Barefoot vs. Shod. *Int J Sports Med* 2018;39(2):97-103. doi: 10.1055/s-0043-120344 [published Online First: 2017/11/16] [LOE 3]
